# Anti-*Plasmodium* Activity of Angiotensin II and Related Synthetic Peptides

Ceres Maciel<sup>1</sup>, Vani Xavier de Oliveira Junior<sup>2</sup>, Marcos Antonio Fázio<sup>3</sup>, Rafael Nacif-Pimenta<sup>4</sup>, Antonio Miranda<sup>3</sup>, Paulo F. P. Pimenta<sup>4</sup>, Margareth Lara Capurro<sup>1\*</sup>

**1** Department of Parasitology, Institute of Biomedical Sciences, University of São Paulo, São Paulo, Brazil, **2** Natural and Human Science Center, Federal University of ABC, Santo André, Brazil, **3** Department of Biophysics, Federal University of São Paulo, São Paulo, Brazil, **4** Laboratory of Medical Entomology, René Rachou Institute of Research, Oswaldo Cruz Foundation—FIOCRUZ, Belo Horizonte, Brazil

## Abstract

*Plasmodium* species are the causative agents of malaria, the most devastating insect-borne parasite of human populations. Finding and developing new drugs for malaria treatment and prevention is the goal of much research. Angiotensins I and II (ang I and ang II) and six synthetic related peptides designated Vaniceres 1–6 (VC1–VC6) were assayed *in vivo* and *in vitro* for their effects on the development of the avian parasite, *Plasmodium gallinaceum*. Ang II and VC5 injected into the thoraces of the insects reduced mean intensities of infection in the mosquito salivary glands by 88% and 76%, respectively. Although the mechanism(s) of action is not completely understood, we have demonstrated that these peptides disrupt selectively the *P. gallinaceum* cell membrane. Additionally, incubation *in vitro* of sporozoites with VC5 reduced the infectivity of the parasites to their vertebrate host. VC5 has no observable agonist effects on vertebrates, and this makes it a promising drug for malaria prevention and chemotherapy.

**Citation:** Maciel C, de Oliveira Junior VX, Fázio MA, Nacif-Pimenta R, Miranda A, et al. (2008) Anti-*Plasmodium* Activity of Angiotensin II and Related Synthetic Peptides. PLoS ONE 3(9): e3296. doi:10.1371/journal.pone.0003296

**Editor:** Adam J. Ratner, Columbia University, United States of America

**Received:** April 3, 2008; **Accepted:** September 8, 2008; **Published:** September 29, 2008

**Copyright:** © 2008 Maciel et al. This is an open-access article distributed under the terms of the Creative Commons Attribution License, which permits unrestricted use, distribution, and reproduction in any medium, provided the original author and source are credited.

**Funding:** This work is supported by Fundação de Amparo a Pesquisa do Estado de São Paulo (FAPESP). A.M., C.M. and M.L.C. are fellows from CNPq.

**Competing Interests:** The authors have declared that no competing interests exist.

\* E-mail: mcapurro@icb.usp.br

## Introduction

Malaria remains one of the world's most deadly diseases. However, efforts to control this disease are hampered by drug resistance in parasites, insecticide resistance in mosquitoes, and the lack of an effective vaccine [1]. Malaria parasites (*Plasmodium* sp) have an intricate and complex life cycle in vertebrate (intermediate) and invertebrate (definitive) hosts, and the multiple developmental forms of *Plasmodium* species are potential targets of distinct antiparasite molecules. For example, the mosquito-stage parasites can be disrupted by natural and engineered peptides, such as the antimicrobial peptides (AMP) cecropin, magainin, defensin, scorpine and cecropin-like peptides [2–6]. However, all the AMPs tested thus far fall short of the requirements for an effective anti-plasmodial molecule since they require high concentrations both *in vivo* and *in vitro* to be effective. These results support the search for alternative molecules, including novel peptides with lower effective doses.

Antimicrobial peptides kill bacteria by interfering with metabolism, targeting cytoplasmic components and disrupting membranes [7]. Lipid composition of the target cell membrane is a determining factor in the activity and selectivity of AMPs for avoiding damage to host cells [8,9]. Peptides with parasitocidal effects on sporozoites could be utilized to target parasites within their vector mosquitoes. These same peptides, being harmless to vertebrate hosts, would have a broader application in malaria prophylaxis by targeting circulating sporozoites and preventing the establishment of infection. With this aim, we used the avian malaria parasite, *Plasmodium gallinaceum*, as a model system to

search for drugs with both properties: toxicity to parasites and harmless to vertebrates and invertebrate hosts. We report here that a synthetic angiotensin II-related, vertebrate-inactive peptide (VC5) kills *P. gallinaceum* sporozoites *in vitro* and *in vivo* and discuss possible applications of this finding in the development of novel malaria control strategies.

## Results

### Ang I, ang II and VC1–VC6 peptides reduce the number of *P. gallinaceum* sporozoites in salivary glands

Injection of ang II (5–60  $\mu$ M) in the hemolymph of *P. gallinaceum* infected *Ae. aegypti* reduces sporozoites accumulation in the salivary glands and does not affect mosquito survival (Supporting Materials, Figure S1 and Figure S2). Following this initial observation, synthetic ang II related peptides were designed and tested for their anti-parasite activities. Injection of 0.5  $\mu$ l of synthetic peptides VC1–VC 6, ang I and ang II (at 60  $\mu$ M concentration) in infected mosquitoes resulted in reduced numbers of sporozoites in their salivary glands when compared with controls injected with either PBS or ang I (Figure 1). VC1 showed the least effect on accumulation of sporozoites, while ang II and VC5 where the most effective reducing by 88% ( $p < 0.0001$ ) and 76% ( $p < 0.001$ ), respectively, the number of parasites compared to control infected mosquitoes. Additionally, each peptide was tested for its anti-sporozoite activity in three independent experiments and only ang II and VC5 were consistently effective ( $p < 0.005$ ) in reducing the number of salivary glands parasites.

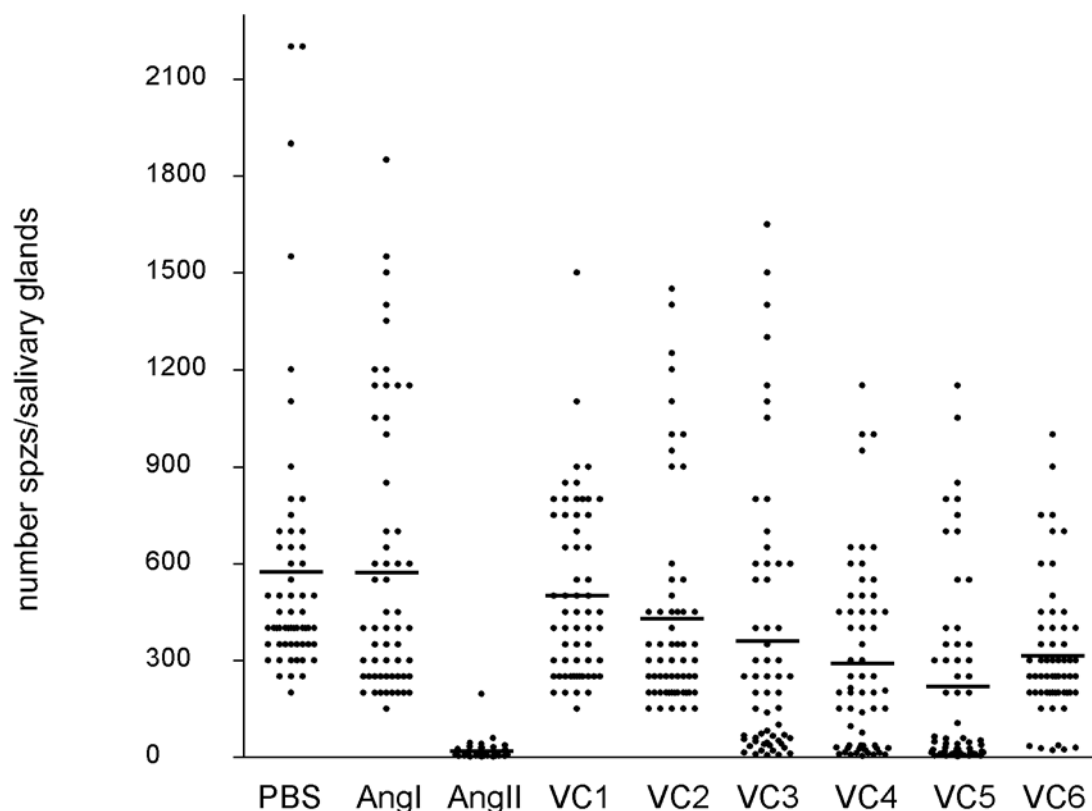

**Figure 1. Numbers of sporozoites in salivary glands of angiotensin I-, angiotensin II- or synthetic peptide-treated *Ae. aegypti*.** At day 7 post-infection 0.5  $\mu$ l of ang I (60  $\mu$ M), ang II (60  $\mu$ M), VC1 (60  $\mu$ M), VC2 (60  $\mu$ M), VC3 (60  $\mu$ M), VC4 (60  $\mu$ M), VC5 (60  $\mu$ M), VC6 (60  $\mu$ M) and PBS (control) were microinjected intrathoracically on anesthetized *Ae. aegypti*. Salivary glands were dissected 24 hours after the microinjection and sporozoites counted. Kruskal–Wallis tests indicated significant effects ( $p < 0.0001$  and  $p < 0.001$ ) of the peptides in the number of salivary glands sporozoites for ang II and VC5, respectively. VC1, VC2, VC3, VC4, VC6 did not significant effect ( $p > 0.05$ ). doi:10.1371/journal.pone.0003296.g001

### Ang I, Ang II and VC1-VC6 increase sporozoite membrane permeability

Mature sporozoites were recovered from salivary glands and incubated *in vitro* with ang II or VC peptides. Cell membrane integrity was monitored at 10 minutes intervals by adding propidium iodide to the treated parasite samples (Figure 2). Sixty-four percent of the sporozoites showed nuclear fluorescence indicative of cell damage after 10 minutes incubation with 60  $\mu$ M ang II, and 78% showed fluorescence after 30–60 minutes. VC1, VC2, VC3, VC4 and VC6, respectively, resulted in 73%, 51%, 51%, 64% and 38%, sporozoites with fluorescent nuclei after 1 hour incubation. VC5 resulted in a kinetic profile similar to that obtained with ang II. Incubations with 60  $\mu$ M VC5 yielded 51%, 67% and 78% fluorescent sporozoites at 10, 20 and 60 minutes, respectively. Fluorescence accumulation in the nuclei was observed in only 47% of the sporozoites treated with 60  $\mu$ M ang I after 1 hour incubation.

Further evidence of the association of ang II and VC5 peptides with the sporozoite cell membrane was obtained by scanning electron microscopy (Figure 3). Sporozoites incubated with VC5 show surface damage evidenced by cytoplasmic protrusions, and this is consistent with the propidium iodide staining of their nuclei (Figure 2).

### Parasitological evidence of inactivation of salivary gland sporozoites by VC5

Vertebrate-infective parasites harvested from mosquito salivary glands were incubated *in vitro* with VC5 and then inoculated into

chickens. Both the infection rates (15%) and the pre-patent periods (7–21 days) were affected (Table 1). Only four of nine chickens challenged with VC5-treated sporozoites became infected, and those showed an increased pre-patent period, 7 to 21 days, compared to six days post-infection in the control group. Parallel incubations *in vitro*, without VC5, under identical conditions did not diminish the infectivity of parasites, as demonstrated by the infection of 100% of chickens challenged with these control samples. This preliminary experiment further support that VC5 interacts with malaria parasites cell membrane indicates that this interaction results in non-infectious sporozoites.

### Agonistic activities of synthetic VC1-VC6 and ang II

In addition to applications of VC5 and ang II to target sporozoites in the vector mosquitoes, these peptides also could be useful to block parasite development in vertebrate hosts. Angiotensin II is a well-known direct activator of smooth muscle in the vasculature, constricting arteries and veins and increasing blood pressure. Assays of ileum contraction, commonly used to determine vasoconstriction activities, were utilized to test agonistic activities of the peptides on guinea pig (GPI), chicken ileum (CI) and rat uterus (RU) preparations. When compared with ang II (100% activity), VC1 had 5%, 0% and 2.0% of agonist activity on GPI, CI and RU, respectively (Table 2). VC2 had 10%, 0% and 2.9% of activity for GPI, CI and RU. VC3, VC4, VC5 and VC6 activities were less than 0.3%, consistent with the interpretation that the VC1-6 peptides have low or no agonistic action.

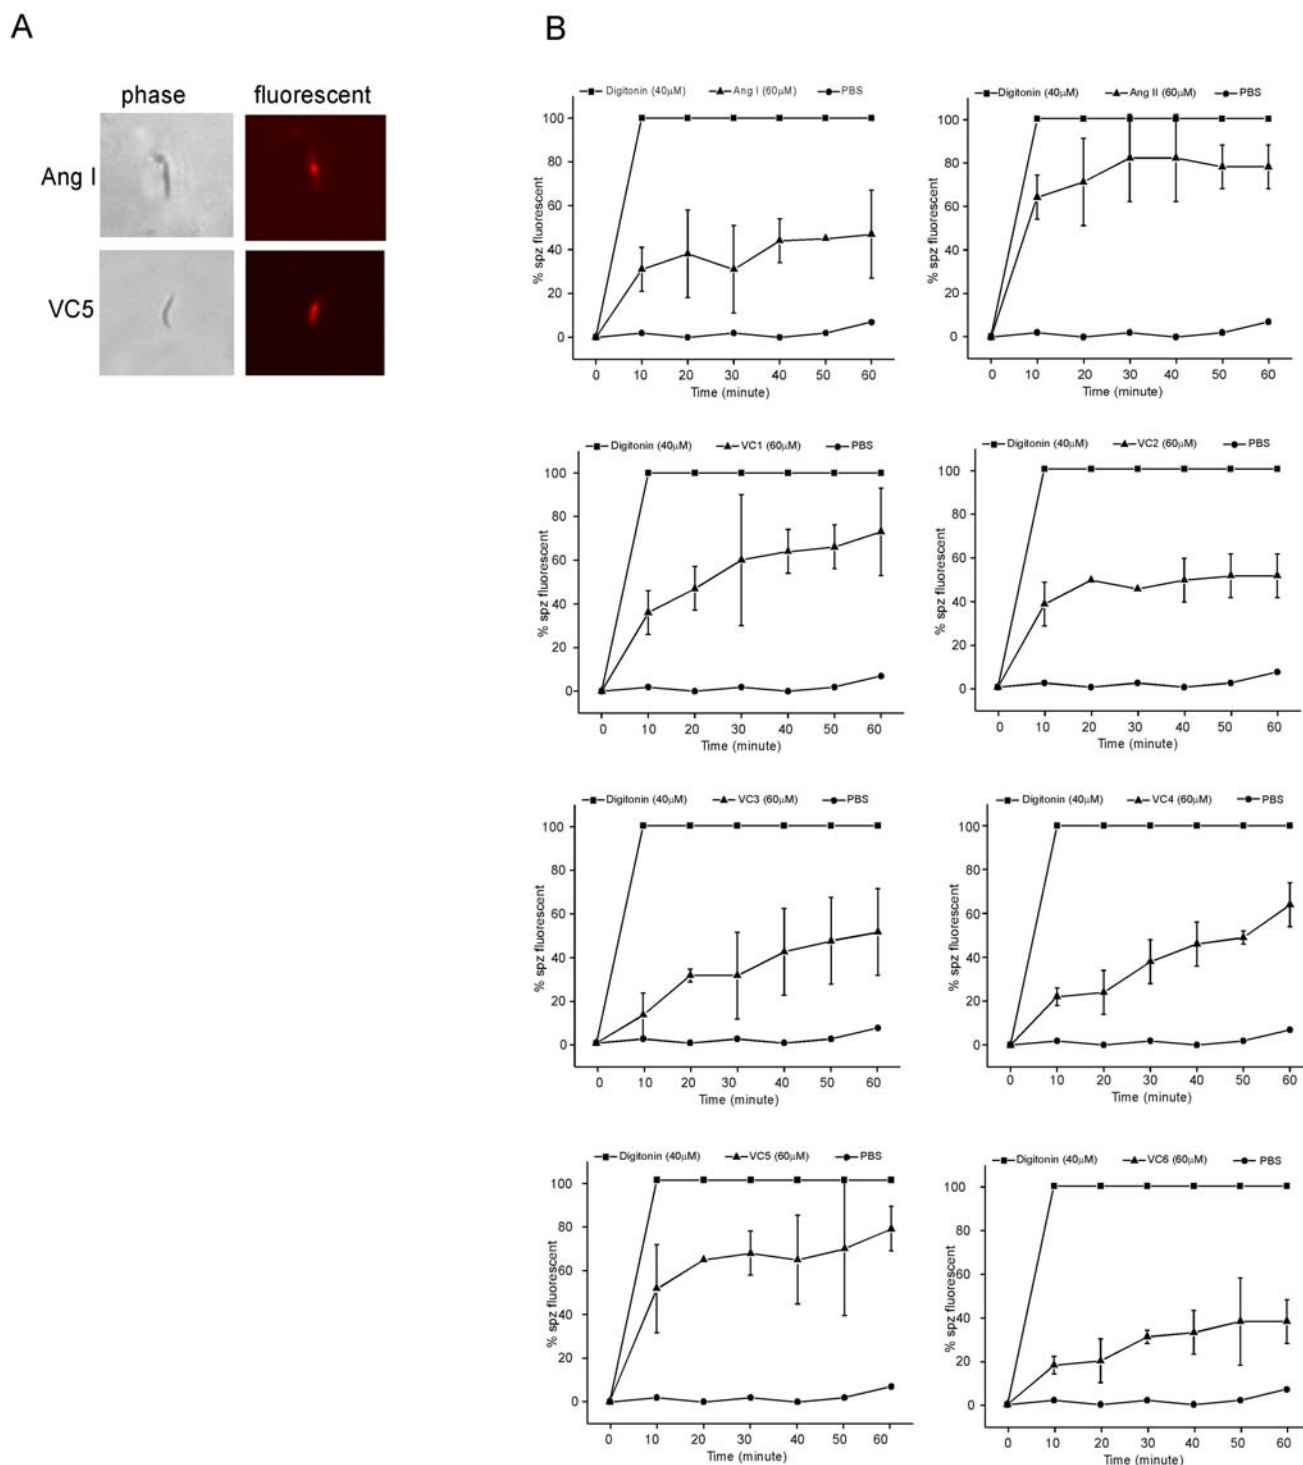

**Figure 2. Effects of peptides on membrane permeability of mature sporozoites were incubated with digitonin, PBS, 60 μM of ang I, ang II, VC1, VC2, VC3, VC4, VC5 or VC6.** After defined intervals at room temperature, propidium iodide was added and the sporozoites were examined by fluorescent microscopy. A, sporozoites in phase (left) and fluorescent (right) microscopy; B, kinetic curves of membrane fluorescence. Results are the mean of three independent experiments, and bars represent standard errors of the mean. The data were statistical analyzed (60 min) using Fisher's test showing that ang II, VC1 and VC5 are significant different ( $p < 0.02$ ) when compared with control. On the other hand, ang I, VC2, VC3, VC4 and VC6 are not significantly different ( $p > 0.05$ ).  
doi:10.1371/journal.pone.0003296.g002

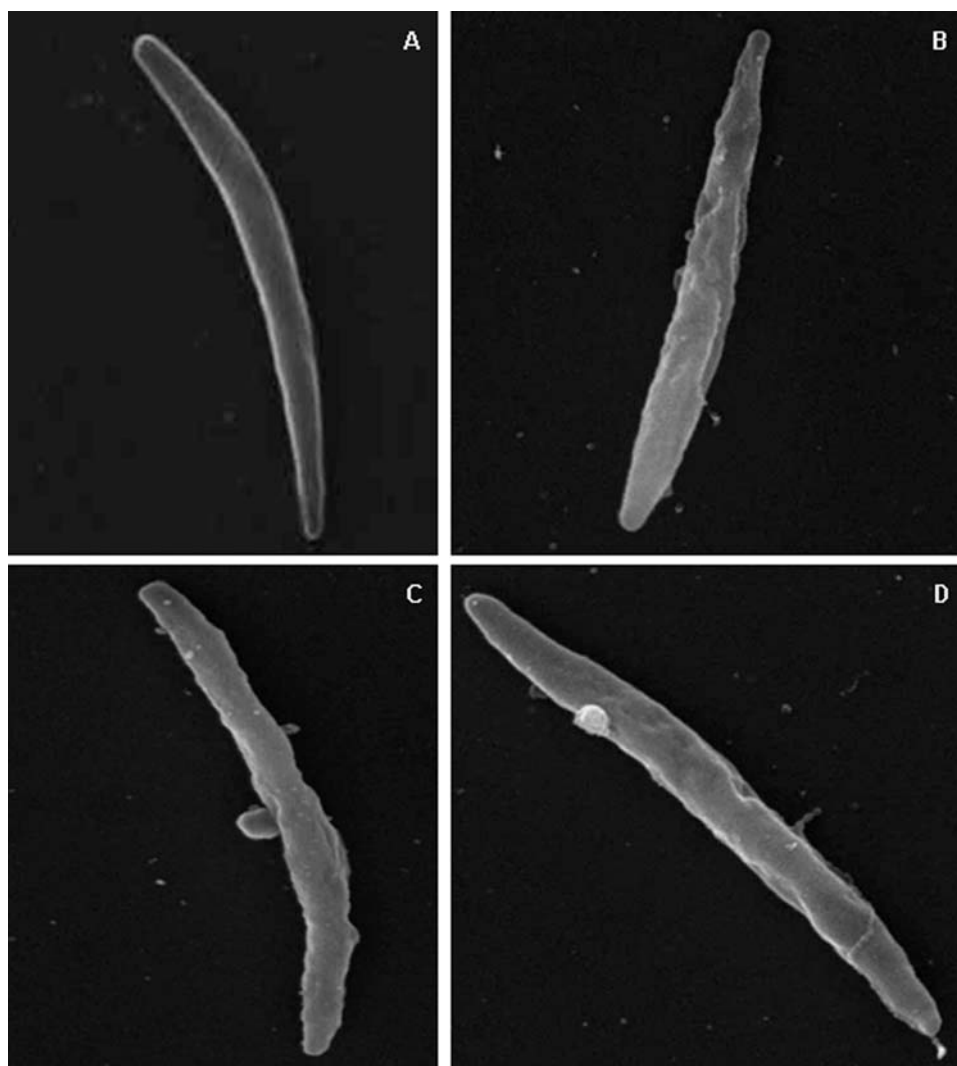

**Figure 3. Scanning electron microscopy of salivary gland-derived *P. gallinaceum* sporozoites.** Parasites were incubated with PBS (A, control), angiotensin II (B) and VC5 (C and D). Note the smooth surface of the non-treated sporozoites (PBS-control) with the rough surface of the drug-treated parasites (ANG II and VC5).  
doi:10.1371/journal.pone.0003296.g003

### Stability and absence of hemolytic activity of ang II and VC1-VC6

Hemolytic activity was evaluated using fresh human erythrocytes harvested and incubated with serial dilutions of the peptides, and concentrations varying between 0.19–100  $\mu$ M. Hemolysis was not detected even at the higher concentrations (Table 2). Ang II

and VC1-VC6 analogue stability in blood was evaluated in non-heat inactivated human serum, demonstrating that the peptides were degraded within 30 minutes of incubation, as determined by LC/ESI-MS (data not shown). The quick clearing of the molecules, low or no agonist activity and the absence of hemolysis caused by the peptides are indicative of their general non-toxicity to vertebrates.

**Table 1. Infectivity for chicks of *P. gallinaceum* spzs from salivary glands after incubation with 60  $\mu$ M of VC5.**

|                                   | Inoculum size <sup>a</sup> | Chicks n° infected/n° injected | Prepatent period <sup>b</sup> (Days) |
|-----------------------------------|----------------------------|--------------------------------|--------------------------------------|
| <b>VC5 (60 <math>\mu</math>M)</b> | 50                         | 1/3                            | 9                                    |
|                                   | 500                        | 3/5                            | 7, 12, 21                            |
| <b>PBS</b>                        | 50                         | 5/5                            | 6                                    |
|                                   | 500                        | 1/1                            | 6                                    |

<sup>a</sup>The chicks were i.v. inoculated after 1 hour incubation of spzs and VC 5 or PBS.

<sup>b</sup>Pre-patent period is 6 days.

doi:10.1371/journal.pone.0003296.t001

**Table 2.** Effects of peptides on vertebrate tissues

| Peptide | Compound Name <sup>a</sup>                                            | HPLC <sup>b</sup> | CZE <sup>c</sup> | MS <sup>d</sup> | Agonist Activity <sup>e</sup> |                  |            | Hemolytic Activity |               |
|---------|-----------------------------------------------------------------------|-------------------|------------------|-----------------|-------------------------------|------------------|------------|--------------------|---------------|
|         |                                                                       |                   |                  |                 | Measured                      | Guinea Pig Ileum | Rat Uterus | Rat blood pressure | Chicken Ileum |
| Ang II  | —                                                                     | 99                | 98               | 1046.2          | 1046.5                        | 100              | 100        | 100                | neg           |
| VC 1    | Cyclo(0-1aI[Asp <sup>0</sup> , endo-(Lys <sup>1a</sup> )]-All         | 97                | 97               | 1271.5          | 1272                          | 5.0              | 2.0        | 2.0                | neg           |
| VC 2    | [Asp <sup>0</sup> , endo-(Lys <sup>1a</sup> )]-All                    | 95                | 96               | 1289.5          | 1289                          | 10.0             | 2.9        | 2.1                | neg           |
| VC 3    | Cyclo(1a-2a)[endo-(Asp <sup>1a</sup> , endo-(Lys <sup>2a</sup> )]-All | 95                | 95               | 1271.5          | 1272                          | 0.2              | 0.3        | 0.4                | neg           |
| VC 4    | [endo-(Asp <sup>1a</sup> , endo-(Lys <sup>2a</sup> )]-All             | 98                | 95               | 1289.5          | 1291                          | 0.0              | <0.1       | 0.5                | neg           |
| VC 5    | Cyclo(2a-3a)[endo-(Asp <sup>2a</sup> , endo-(Lys <sup>3a</sup> )]-All | 95                | 95               | 1271.5          | 1272                          | 0.0              | <0.1       | <0.1               | neg           |
| VC 6    | [endo-(Asp <sup>2a</sup> , endo-(Lys <sup>3a</sup> )]-All             | 97                | 96               | 1289.5          | 1289                          | 0.0              | 0.2        | <0.1               | neg           |

<sup>a</sup>In convention with IUPAC-IUB, Biochemistry 1967, 6(1), 362-368.<sup>b</sup>Percent purity determined by RP-HPLC using buffer systems: A = 0.1% TFA/H<sub>2</sub>O and B = 60% CH<sub>3</sub>CN/0.1% TFA in H<sub>2</sub>O with a gradient slope of 3% B/min, at flow rate of 1.5 ml/min on a Beckman C<sub>18</sub> column (4.6×150 mm, 5 μm particle size, 300 Å pore). Determination at λ = 214 nm.<sup>c</sup>CZE was done using a Waters System, model C1A (Capillary Ion Analyzer) by hydrostatic injection in 25 seconds, utilizing Phosphate buffer pH 2.50, silica capillary (75 μm ID×60 cm length), field strength of 20 kV at temperature 30 °C. Determination at λ = 214 nm.<sup>d</sup>Molecular weights were determined by MALDI-TOF using a α-ciano-4-hydroxycinnamic acid matrix.<sup>e</sup>Biological activities of VC1-6 were compared to those of angiotensin II on the guinea pig ileum, rat uterus, rat blood pressure and chicken ileum. The hemolytic activity of angiotensin II and its analogues was measured at a peptide concentration ranging from 0.19 to 100 μM.  
doi:10.1371/journal.pone.0003296.t002

## Discussion

A recent worldwide trend of attention to malaria control has come with accompanying financial support directed towards the development of new drugs, anti malarial vaccines and alternatives for vector population management [10]. Technical developments such as the sequencing of the genomes of malaria parasites [11] and the vector mosquito *Anopheles gambiae* [12], and the ability of generating parasite-resistant genetically-modified mosquitoes [13] have been heralded as keystones for the development of novel malaria control tools. Our efforts to develop peptides with anti-malarial activities led us to determine serendipitously that angiotensin II affects negatively the development of malaria parasites. Here we report our initial examination of the mechanisms that result in such effect.

Ang II is derived from the constitutively-produced angiotensinogen, a peptide of the serpin family released into the circulation mainly by the vertebrate liver. When blood pressure decreases in the kidneys the enzyme rennin is produced and cleaves the peptide bond between the leucine (Leu) and the valine (Val) residues creating the ten amino acid peptide angiotensin I (ang I). Ang I has little biological effect and it is processed further to ang II by removal of two of the terminal amino acid residues. Ang II plays an endocrine role in the regulation of blood pressure, fluid and electrolyte homeostasis. In addition, studies have shown that numerous tissues and organs contain their own locally-generated angiotensin products that exhibit tissue-specific activities [14]. Therefore, the biological activities of ang II preclude its utilization as an anti-malarial drug. Modifications of the molecular structure of ang II were then considered, and we designed six related peptides (VC1-VC6) that were further analyzed. VC5 displayed no agonistic effects and killed malaria sporozoites in the conditions utilized in our experiments. The mechanism of parasite killing was further investigated by biochemical and morphological applications. VC5 and ang II kill *P. gallinaceum* sporozoites by disruption of their plasma membrane. Moreover, these peptides have no similar effect upon vertebrate cells. The observed specificity may be explained by the markedly different lipid compositions of *Plasmodium* and vertebrate cells plasma membranes [15]. VC5 is a promising molecule to be tested for malaria prevention and chemotherapy.

## Final Remarks

Our research shows that angiotensin-related peptides affect malaria parasite survival. These peptides were engineered successfully to abolish their agonist functions while retaining parasitocidal activity, opening new research possibilities. Presently, the design, synthesis, and biological evaluation of new analogues are in progress in our laboratories with the ultimate goal of generating further information on the structural requirements for ang II analogues bioactivity and conformation. These studies focus on bridge-length optimization and amino acid chirality that may improve molecular stability against protease presents on plasma and result in longer time of action. Additional research is necessary to further characterize the mechanism of action of these peptides to kill *Plasmodium* parasites and direct future efforts in drug development that can contribute to the control of malaria.

## Materials and Methods

### Peptide synthesis, purification and characterization

Angiotensin II (ang II)-related peptides were synthesized by a solid-phase method using the t-Boc strategy on a chloromethylated resin [16], with substitutions varying from 0.5–0.8 mequiv/g. The

following side-chain protected Boc-amino acids were employed from Bachem Inc. (Torrance, CA): Arg(Tos), Asp(OcHex) and (OFm), His(Tos), Lys(Fmoc) and Tyr(2-Cl-Bzl). Ang II reagents and solvents were of analytical grade and used from freshly opened containers without any further purification. The N $^{\alpha}$ -terminal protections were removed with 50% TFA in methylene chloride in the presence of 2% anisole for 20 min. Couplings were done using 2.5-fold excess of 1,3-diisopropylcarbodiimide/N-Hydroxybenzotriazole (DIC/HOBt) in methylene chloride-dimethylformamide (DCM-DMF) (1:1, v/v). Both steps were monitored by the ninhydrin test [17]. Couplings times were 1–2 h, and when needed, recouplings of 1 h were done using 2.5-fold excess *o*-benzotriazol-1-yl-N,N',N'-tetramethyluronium tetrafluoroborate (TBTU) in the presence of excess N-N'-diisopropylethylamine (DIEA) in methylene chloride-1-methyl-2-pyrrolidone (DCM-NMP) (1:1, v/v) [18]. Boc-His (Tos) DCHA (*dicyclohexylammonium salt*) incorporation employed a 1.5-fold excess of TBTU in presence of excess of diisopropylethylamine (DIPEA). Acetylations were performed with 50% acetic anhydride in DMF for 15 min when required. The orthogonal protection of the side chain of the aspartic acid (OFm) and lysine (Fmoc) residues were used in order to allow the lactam bridge formation with the peptide still attached to the resin [19]. After washes with DCM, DMF, the OFm/Fmoc groups were removed by 20% piperidine in DMF. The peptide-resin was cyclized by reaction with 3.0-fold excess of benzotriazol-1-yl-oxy-tris-(dimethylamino)phosphonium hexa-fluorophosphate (BOP) in the presence of excess DIEA in 20% DMSO/NMP. After washing the cyclization was repeated every 20 minutes. The reaction was followed by the Kaiser ninhydrin test [17]. The dry protected peptidyl-resin was exposed to anhydrous hydrogen fluoride (HF) in the presence of 5% anisole and of 5% dimethylsulfide for 75 min at 0°C. HF excess and scavenger were eliminated under high vacuum. The crude peptides were precipitated with anhydrous diethyl ether, separated from ether-soluble by filtration, extracted from the resin with 5% acetic acid in H<sub>2</sub>O and lyophilized. The crude lyophilized peptides were purified in two steps (triethylammonium phosphate (TEAP) pH = 2.25 and 0.1% TFA) by preparative Reversed Phase-High Performance Liquid Chromatographic (RP-HPLC) on a Waters Associates system (Model Prep 4000), using linear gradients (slope 0.33% B/min). Briefly, they were loaded on a Vydac C<sub>18</sub> (25×250 mm, 15  $\mu$ m particle size, 300Å pore size) preparative RP-HPLC column at a flow rate of 7.0 ml/min and eluted with TEAP (pH = 2.25)/CH<sub>3</sub>CN, and detection at 220 nm. Selected fractions were collected and converted to the Trifluoroacetic acid (TFA) salt by loading on a preparative column as mentioned above and eluted using a linear gradient (slope 0.33 or %B/min) containing a mixture of solvents A [0.1% TFA/H<sub>2</sub>O] and B [0.1% TFA in CH<sub>3</sub>CN/H<sub>2</sub>O (75:25)] at a flow rate of 7.0 ml/min. Selected fractions containing the purified peptide were pooled and lyophilized [20]. Analytical RP-HPLC was performed on a Waters Associated system using a linear gradient of 5–95% B for 30 min, using buffer system: A = 0.1% TFA/H<sub>2</sub>O and B = 0.1% TFA-60% CH<sub>3</sub>CN/H<sub>2</sub>O, at 1.5 ml/min, on a Beckman C<sub>18</sub> column (4.6×150 mm, 5  $\mu$ m particle size, 300Å pore size) at 215 nm. Capillary zone electrophoresis was done by using a Waters System, model CIA (Capillary Ion Analyzer) by hydrostatic injection in 25 seconds, utilizing Phosphate buffer pH 2.50,  $\lambda$  = 214 nm, silica capillary (75  $\mu$ m×60 cm), voltage 20 kV at 30°C. Amino acids analyses were made by the ninhydrin method using an automatic analyzer Beckman, model System 6300. Peptides were hydrolyzed (1 mg) using 1 ml of HCl 6 M, in the presence of phenol 0.08 ml to 5% in water at 110°C for 72 hours in atmosphere of N<sub>2</sub>. After hydrolysis, the material was vacuum-

concentrated and dissolved in 0.2 M sodium citrate, pH 2.2, filtered through Millipore (pore 0.45  $\mu$ m) before being injected in the analyzer. The molar relationship of the amino acids was established using the concentration unitary of the closest amino acid of the average for all the residues [21]. The peptides were analyzed on a Micromass spectrometer model ToFSpec SE using voltage = 20 KV, suppression at 500 AMU, Mode Reflectron (10 KV) and the  $\alpha$ -ciano-4-hydroxycinnamic acid solid matrix. The spectrometer was periodically calibrated with angiotensin I and AII. Purified peptides were characterized (Table 2), by RP-HPLC (Reversed-Phase Liquid Chromatography), CE (Capillary Electrophoreses), AAA (Amino acid Analyses) and MS (Mass Spectroscopy). The characterization results showed that the amino acid proportion were in agreement with the expected values by AAA (data not shown), purity in HPLC and CE showed to be above 95%, and had appropriate molecular weights by mass spectroscopy. (Table 2).

### Agonistic VC5 activity to angiotensin II

Peptide agonist bioassays were performed in isolated guinea pig, rat and chicken ilea comparison the synthetic peptides with ang II. Male guinea pigs (weight: 200–250g) and chickens (30–40g) were sacrificed and the terminal portions of the ileum removed and washed several times with Tyrode solution (8 g NaCl; 0.2 g CaCl<sub>2</sub>; 0.1 g MgCl<sub>2</sub>; 0.2 g KCl; 1 g NaHCO<sub>3</sub>; 0.05 g NaHPO<sub>4</sub> and 1g of glucose per liter of water). After 15 minutes in nutritive solution at room temperature, the ileum was sectioned (4.5 cm) and fixed in the perfusion chamber with 5 ml of aerated Tyrode solution bubbled with a gas mixture of 95% O<sub>2</sub>/5% CO<sub>2</sub> at 37±0.5°C. Isotonic contractions were registered by a chimograph (Palmer), under a resting load of 1g. VC5 was dissolved in H<sub>2</sub>O (1.0 mg/ml), diluted in 0.9% NaCl and added to the perfusion chamber. After 90 seconds, the preparation was washed with Tyrode solution. The measurements of agonist activity were done in triplicate.

Blood pressure assays were conducted on female rats (250–300 g) anesthetized with a ketamine-xylazine (Ketamine 80 mg/kg and Xylazine 8 mg/kg) solution and maintained by artificial breathing. A catheter was inserted into the carotid artery and used to register the blood pressure with a pressure transducer (Hewlett-Packard, model 1280C-02), amplifier (Hewlett-Packard, model 8805B) and chart recorder (ECB, model RB102). Isotonic solutions of the peptides were injected in the femoral vein using a polyethylene catheter inserted (Table 2).

### Hemolytic activity

Hemolytic activity was evaluated on fresh human erythrocytes washed three times with phosphate-buffered saline (PBS: 10 mM Na<sub>2</sub>HPO<sub>4</sub>, 1.8 mM K<sub>2</sub>-HPO<sub>4</sub>, pH 7.4, containing 140 mM NaCl and 2.7 mM KCl) [22]. Serial dilutions of the peptides with concentrations varying between 0.19–100  $\mu$ M were incubated in Eppendorf tubes with a suspension of 0.4% erythrocytes in PBS. After 1 h at 37°C, the test tubes were centrifuged at 300g for 5 min at 5°C. Fifty microliter aliquots of the supernatants were transferred to 96-well plates and hemolysis was monitored at 405 nm using a microtiter plate reader. Negative and positive controls were prepared in PBS and in PBS supplemented with 0.1% SDS, respectively. Ang II of the experiments was performed in triplicate.

### Serum stability

Twenty microliters of an aqueous peptide stock solution (10 mg/ml) were added to 1 ml of 25% pooled non-heat inactivated human serum in PBS and incubated at 37°C.

Aliquots of 50  $\mu\text{l}$  were added to 5  $\mu\text{l}$  of TFA at time intervals (0, 10, 20, 30, 60 and 120 minutes). The resulting mixtures were kept at 5°C for 10 min and then centrifuged at 300 $\times$ g for 5 min. Twenty microliters of the supernatants were injected in a LC/ESI-MS equipment and the components separated using a linear gradient of acetonitrile in acidified water (0.1% TFA) at a flow rate of 0.4 ml/min from 5% to 95% B (0.1% TFA/60% CH<sub>3</sub>CN/H<sub>2</sub>O) in 30 min. Peptide consumption mentored as an area decrease under the corresponding peak in the chromatogram allowed the evaluation of the stability of the peptide in serum. All the experiments were performed in triplicates.

### Mosquito rearing and maintenance of the parasite life cycle

The RED strain of *Aedes aegypti* is highly susceptible to *P. gallinaceum* [23] and was used in all experiments. Mosquitoes were reared using standard laboratory procedures [24].

An aliquot of frozen chicken blood infected with *P. gallinaceum* strain 8A was obtained from A. Kretzli (René Rachou Institute of Research, FIOCRUZ, MG, Brazil). This sample was used to inoculate and establish initial infections in chickens. All subsequent infections of chickens and mosquitoes were accomplished by feeding mosquitoes on chickens.

### Mosquito injection

Each synthetic peptide was injected (0.5  $\mu\text{l}$  of 60  $\mu\text{M}$ ) into a group of naturally-infected mosquitoes seven days after a blood meal, at a time when sporozoites were anticipated to be present in the hemolymph. The same volume of PBS was injected into a control group. Injections were performed using a finely-drawn calibrated glass microcapillary tube to deliver the solutions into the thorax. After 24 hours, individual pairs of salivary glands were dissected, homogenized in 10  $\mu\text{l}$  PBS, placed on a hemacytometer and the sporozoites counted using phase-contrast microscopy. This procedure allowed the examination of the whole salivary gland for sporozoites [25]. All fields of the hemacytometer were examined thoroughly in low parasites densities samples and five fields were averaged for high parasite densities samples.

### Inactivation of sporozoite infectivity

*In vitro* experimental treatments were performed with 50–500 sporozoites isolated from salivary glands 13 days after mosquito infection. Parasites were mixed with synthetic peptides to final concentration of 60  $\mu\text{M}$ . After 1-hour incubation at room temperature, the samples were injected intravenously into two-days-old chickens. Blood smears were taken daily from each chicken (6 to 25 days after inoculation), stained with Giemsa after methanol fixation, and examined by light microscopy at magnification of 1000 $\times$ . The pre-patent period was calculated as number of days between inoculation and detection of circulating parasites in the chickens.

### Effects of Angiotensin I (ang I), Angiotensin II (ang II) and Vaniceres 1-6 (VC1-6) on salivary gland-derived *Plasmodium gallinaceum* sporozoites

Three thousand *P. gallinaceum* mature sporozoites were recovered from salivary glands and incubated with 40  $\mu\text{M}$  digitonin, 60  $\mu\text{M}$  ang I, 60  $\mu\text{M}$  ang II, 60  $\mu\text{M}$  VC1-6 or PBS at room temperature. Cell membrane integrity was then monitored at 10 minutes intervals by adding propidium iodide to the treated parasites.

### Scanning electron microscopy

Freshly-purified sporozoites from salivary glands were incubated in 50  $\mu\text{l}$  PBS at room temperature in the absence or presence of 60  $\mu\text{M}$  ang II and 60  $\mu\text{M}$  VC5. After incubation, 10  $\mu\text{l}$  aliquots were separated and fixed overnight with 2.5% glutaraldehyde in 0.1 M cacodylate buffer, pH 7.2. The glutaraldehyde-fixed samples were rinsed three times in PBS and post-fixed in 1% osmium tetroxide solution in 0.8% potassium ferricyanide in 0.1 M cacodylate buffer pH 7.2 for two hours, and then washed three times in PBS. The samples were dehydrated in ethanol, dried in critical point device with CO<sub>2</sub> method, mounted in special stubs, coated with platinum particles and analyzed by SEM (JEOL JSM 5600).

### Toxicity assays of VC5 in chicken

The toxic effect of VC5 was evaluated in chickens. Six animals per cage weighing 30–40 g each were housed in groups of 10 in our institutional animal care facility and allowed to adapt for seven days prior to the onset of experiments. Animals were maintained in a temperature-controlled environment (21 $\pm$ 2°C), with free access to water and food. All experiments were carried out in accordance with the guidelines of the Institutional Ethics Review Committee (Colégio Brasileiro de Experimentação Animal–COBEA) and Animal Care of the Institute of Biomedical Sciences (Comissão de ética em experimentação animal–CEEa)–University of São Paulo, protocol #133.

### Statistical analysis

The Kruskal-Wallis test, Fisher's Exact test, chi-square test and Mann-Whitney U test (GraphPad InStat version 3.00 for Windows 95, GraphPad Software, San Diego California USA, www.graphpad.com) was used to assess the statistical significance of the differences between control and peptides injected groups.

### Supporting Information

**Figure S1** Survival of mosquitoes injected with different ang II concentrations. *Ae.aegypti* mosquitoes (10 females) were injected intrathoracically (0.5  $\mu\text{l}$ ) of ang II at 10  $\mu\text{M}$ , 20  $\mu\text{M}$ , 50  $\mu\text{M}$ , 60  $\mu\text{M}$ , 100  $\mu\text{M}$  and 200  $\mu\text{M}$ . After 24 hour the survival of mosquitoes was scored. Chi-square test indicated that no significant effects of the ang II ( $p>0.5$ ) in mosquito survival for all the experiments. Results are the mean of three independent experiments (20 mosquitoes/group), and bars represent standard errors of the mean.

Found at: doi:10.1371/journal.pone.0003296.s001 (0.18 MB TIF)

**Figure S2** Numbers of sporozoites in salivary glands of angiotensin I-, angiotensin II- or synthetic peptide-treated *Ae. aegypti*. At day 7 post-infection 0.5  $\mu\text{l}$  of ang II at 5  $\mu\text{M}$ , 30  $\mu\text{M}$ , 40  $\mu\text{M}$ , 50  $\mu\text{M}$ , 60  $\mu\text{M}$  or PBS (control) were injected intrathoracically in anesthetized *Ae.aegypti*. Salivary glands were dissected 24 hours after the microinjection and sporozoites counted. Mann-Whitney tests indicated significant effects ( $p<0.0001$ ) of the peptides in the number of salivary glands sporozoites at 60  $\mu\text{M}$  concentration.

Found at: doi:10.1371/journal.pone.0003296.s002 (0.48 MB TIF)

### Acknowledgments

We thank Dr. Antonio G. de Bianchi, Dr Carlos E. Winter, Dr. Osvaldo Marinotti and Dr Anthony A. James for helpful comments, suggestions and manuscript revision. We also would like to thank Dr. Lincoln Suesdek Rocha, for the statistical analyses.

## Author Contributions

Conceived and designed the experiments: CM VXOJ MAF RNP AM PFP MLC. Performed the experiments: CM VXOJ MAF RNP. Analyzed the

data: CM VXOJ MAF RNP AM PFP MLC. Contributed reagents/materials/analysis tools: AM PFP MLC. Wrote the paper: CM VXOJ MAF RNP AM PFP MLC.

## References

- O'Neil PM, Posner GH (2004) A medicinal chemistry perspective on artemisinin and related endoperoxides. *Journal of Medicinal Chemistry*. 47: 2945–2964.
- Gwadz RW, Kaslow D, Lee JY, Maloy WL, Zasloff M, et al. (1989) Effects of magainins and cecropins on the sporogonic development of malaria parasites in mosquitoes. *Infection and Immunity*. 57: 2628–2633.
- Shahabuddin M, Fields I, Bulet P, Hoffmann JA, Miller LH (1998) *Plasmodium gallinaceum*: Differential killing of some mosquito stages of the parasite by insect defensin. *Exp Parasitol*. 89: 103–112.
- Ghosh JK, Shao D, Guillaud P, Ciceron L, Mazier D, et al. (1997) Selective cytotoxicity of dermaseptin S3 toward intraerythrocytic *Plasmodium falciparum* and underlying molecular basis. *JBC*. 272: 31609–31616.
- Conde R, Zamudio FZ, Rodriguez MH, Possani LD (2000) Scorpion, an anti-malaria and anti-bacterial agent purified from scorpion venom. *FEBS Letters*. 471: 165–168.
- Morreira CK, Rodrigues FG, Ghosh A, Varotti FdeP, Miranda A, et al. (2007) Effect of the antimicrobial peptide gomesin against different life stages of *Plasmodium* spp. *Exp Parasitol*. 116: 346–353.
- Yeaman MR, Yount NY (2003) Mechanisms of antimicrobial peptide action and resistance. *Pharmacol Rev* 55: 27–55.
- Dagan A, Efron L, Gaidukov L, Mor A, Ginsburg H (2002) In vitro anti-*Plasmodium* effects of dermaseptin S4 derivatives. *Antimicrobial Agents Chemotherapy*. 46: 1059–1066.
- Efron L, Dagan A, Gaidukov L, Mor A (2002) Direct interaction of dermaseptin S4 aminoheptanoyl derivative with intraerythrocytic malaria parasite leading to increased specific antiparasitic activity in culture. *JBC*. 277: 24067–24072.
- WHO (2005) World malaria report 2005. World Health Organization. Geneva Switzerland. Available from: <http://www.rbm.who.int/wmr2005>.
- Gardner MJ, Hall N, Fung E, White O, Berriman M, et al. (2002) Genome sequence of the human malaria parasite *Plasmodium falciparum*. *Nature*. 419: 498–511.
- Holt RA, Subramanian GM, Halpern A, Sutton GG, Charlab R, et al. (2002) The genome sequence of the malaria mosquito *Anopheles gambiae*. *Science*. 298: 129–149.
- Schneider DS, James AA (2006) Bridging the gaps in vector biology. Workshop on the molecular and population biology of mosquitoes and other disease vectors. *EMBO Rep*. 7: 259–262.
- Leung PS (2004) Roles of the rennin-angiotensin system and its blockade in pancreatic inflammation. *Int J Biochem Cell Biol*. 37: 237–238.
- Vial HJ, Ancelin ML (1998) Malarial Lipids. In: Sherman, I.W., editors. *Malaria: Parasite Biology, Pathogenesis, and Protection*. Washington, D.C.: ASM, 1998 11: 159–175.
- Barany G, Merrifield RB (1980) In: *The peptides. Analysis, Synthesis, Biology*, vol. 2 (Gross, E and Meienhofer J, eds.), 1–284, Academic Press Inc, New York.
- Kaiser E, Colescott RL, Bossinger CD, Cook PI (1970) Color test for detection of free terminal amino groups in the solid-phase synthesis of peptides. *Anal Biochem*. 34: 595–598.
- Oliveira VX Jr, Fazio MA, Miranda MTM, Silva JM, Bittencourt JC, et al. (2005) Leptin fragments induce Fos immunoreactivity in rat hypothalamus. *Regulatory Peptides*. 127: 123–132.
- Oliveira VX Jr, Machado A, Fazio MA, Pesquero JB, Santos RL, et al. (2003) Novel angiotensin II lactam bridge cyclic analogues. *Biopolymers*. 71: 372.
- Oliveira VX, Fazio MA, Santos EL, Pesquero JB, Miranda A (2008) In vitro evaluation of leptin fragments activity on the ob receptor. *Journal of Peptide Science*. 14: 617–625.
- Jubilut GN, Marcheto R, Cilli EM, Oliveira E, Miranda A, et al. (1997) Comparative time course study of aminoacyl- and peptidyl-resin hydrolysis. *J Braz Chem Soc* 8: 65–70.
- Fazio MA, Oliveira VX Jr, Bulet P, Miranda MTM, Daffre S, et al. (2006) Structure–activity relationship studies of gomesin: importance of the disulfide bridges for conformation, bioactivities and serum stability. *Biopolymers*. 84: 205–218.
- Thathy V, Severson DW, Christensen BM (1994) Reinterpretation of the genetics of susceptibility of *Aedes aegypti* to *Plasmodium gallinaceum*. *Journal of Parasitology*. 80: 705–712.
- Munstermann LE, Conn JE (1997) Systematics of mosquito disease vectors (Diptera, Culicidae): Impact of molecular biology and cladistic analysis. *Annual Review of Entomol*. 42: 351–369.
- de Lara Capurro M, Coleman J, Beerntsen BT, Myles KM, Olson KE, et al. (2000) Virus-expressed, recombinant single-chain antibody blocks sporozoite infection of salivary glands in *Plasmodium gallinaceum*-infected *Aedes aegypti*. *Am J Trop Med Hyg*. 62: 427–33.
